# Supplementary material for: Vibrio cholerae biofilms use modular adhesins with glycan-targeting and nonspecific surface binding domains for colonization
Source: PubMed Central journal article supplement (PMC10102183; doi:10.1038/s41467-023-37660-0), 2023-04-13
Supplement: 41467_2023_37660_MOESM1_ESM.pdf [file 41467_2023_37660_MOESM1_ESM.pdf]

## Supplementary Information for

### ***Vibrio cholerae* biofilms use modular adhesins with glycan-targeting and nonspecific surface binding domains for colonization**

Xin Huang,<sup>1,2,#</sup> Thomas Nero,<sup>1,#</sup> Ranjuna Weerasekera,<sup>3</sup> Katherine Matej,<sup>1</sup> Alex Hinbest,<sup>3</sup>  
Zhaowei Jiang,<sup>1</sup> Rebecca F. Lee,<sup>4</sup> Longjun Wu,<sup>5</sup> Cecilia Chak,<sup>1</sup> Japinder Nijjer,<sup>1</sup> Isabella  
Gibaldi,<sup>3</sup> Hang Yang,<sup>3</sup> Nathan Gamble,<sup>3</sup> Wai-Leung Ng,<sup>6</sup> Stacy A. Malaker,<sup>2</sup> Kaelyn  
Sumigray<sup>4,7,8</sup>, Rich Olson,<sup>3,\*</sup> Jing Yan<sup>1,9,\*</sup>

<sup>1</sup>Department of Molecular, Cellular and Developmental Biology, Yale University, New Haven, CT, USA.

<sup>2</sup>Department of Chemistry, Yale University, New Haven, CT, USA.

<sup>3</sup>Department of Molecular Biology and Biochemistry, Molecular Biophysics Program, Wesleyan University, Middletown, CT, USA.

<sup>4</sup>Department of Genetics, Yale School of Medicine, New Haven, CT, USA.

<sup>5</sup>Department of Ecology and Evolutionary Biology, Yale University, New Haven, CT, USA.

<sup>6</sup>Department of Molecular Biology and Microbiology, Tufts University School of Medicine, Boston, MA, USA.

<sup>7</sup>Yale Stem Cell Center, Yale School of Medicine, New Haven, CT, USA.

<sup>8</sup>Yale Cancer Center, Yale School of Medicine, New Haven, CT, USA.

<sup>9</sup>Quantitative Biology Institute, Yale University, New Haven, CT, USA.

#These authors made equal contributions

\*Correspondence: [rolson@wesleyan.edu](mailto:rolson@wesleyan.edu) (R.O.), [jing.yan@yale.edu](mailto:jing.yan@yale.edu) (J.Y.)

**This PDF includes:**

Supplementary Figures 1-9; Supplementary Tables 1-2

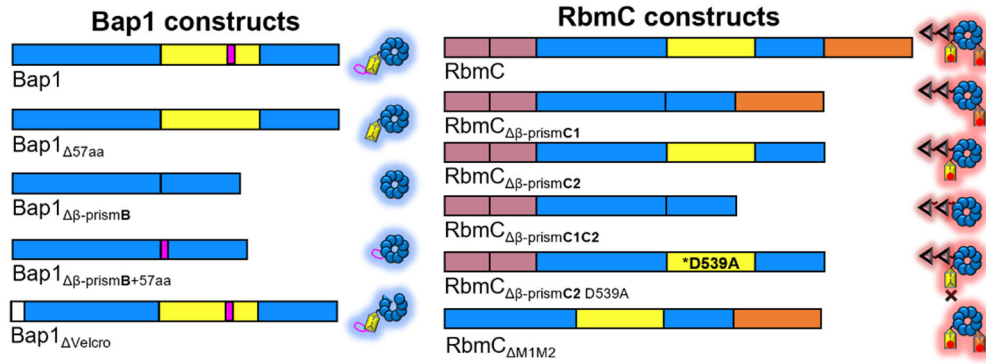

**Supplementary Figure 1 | Schematic of domains and corresponding cartoon representations of Bap1 (*Left*) and RbmC (*Right*) mutants used in this study.**

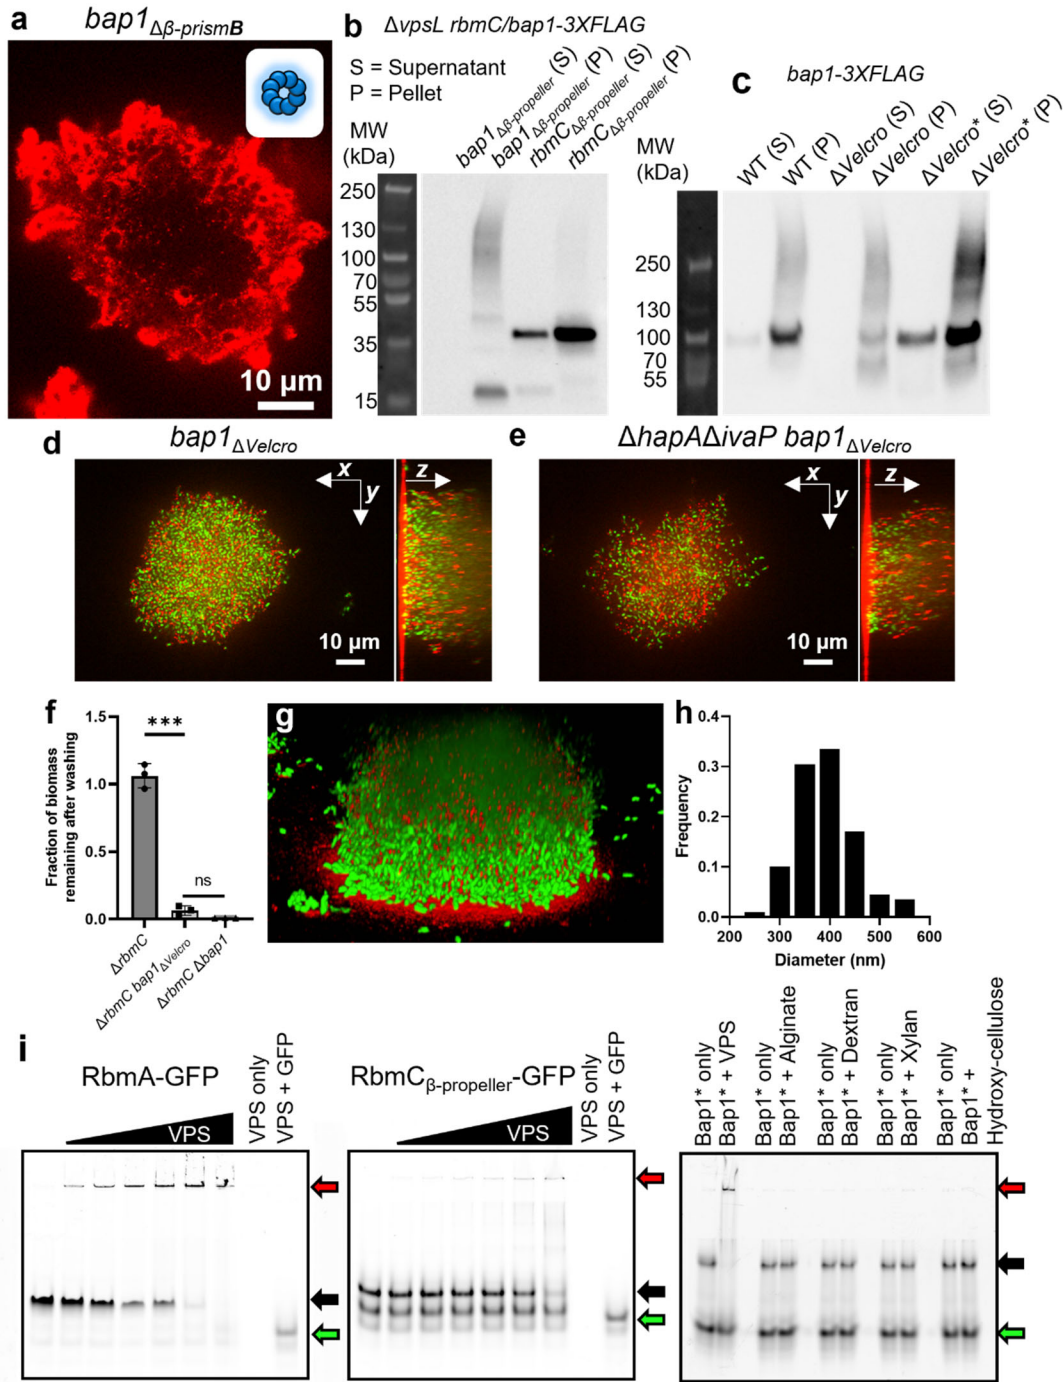

**Supplementary Figure 2|  $\beta$ -propeller anchors Bap1 and RbmC to VPS.** **a**, Cross-sectional images of *bap1* $\Delta\beta$ -*prismB* at  $z = 6 \mu\text{m}$ . Cells constitutively express mNeonGreen; Bap1 was stained with an anti-FLAG antibody conjugated to Cy3. *Bap1* $\Delta\beta$ -*prismB* retains peripheral staining around biofilm clusters, suggesting that VPS binding only requires the  $\beta$ -propeller. **b**, Western blot analysis of the production and secretion of constructs missing the  $\beta$ -propeller in the VPS $^-$  ( $\Delta vpsL$ ) background. A significant fraction of the proteins is found in the cell pellet, indicating a defect in

secretion. Therefore, these mutants were excluded from further analysis. **c**, Western blot of *V. cholerae* strains expressing 3×FLAG-tagged WT or Bap1 $\Delta$ Velcro protein (\* denotes strain lacking *hapA* and *ivaP*). In the WT background, Bap1 $\Delta$ Velcro experiences degradation leading to lower signal intensity. Deleting *hapA* and *ivaP*, the two major extracellular proteases<sup>1</sup>, resolves the degradation problem. **d-e**, Cross-sectional images of *bap1* $\Delta$ Velcro (d) and  $\Delta$ *hapA* $\Delta$ *ivaP* *bap1* $\Delta$ Velcro (e) in the biofilm bulk ( $z = 6 \mu\text{m}$ ). Cells constitutively express mNeonGreen; Bap1 was stained with an anti-FLAG antibody conjugated to Cy3. Note that a functional copy of RbmC is present in these strains. Deletion of *hapA* and *ivaP* does not change the localization or aggregation of the mutant protein. **f**, Biofilm adhesion assay with *bap1* $\Delta$ Velcro, together with positive ( $\Delta$ *rbmC*) and negative ( $\Delta$ *rbmC* $\Delta$ *bap1*) controls. Data are shown as the mean  $\pm$  SD ( $n = 3$  biologically independent samples). Statistics were performed using an unpaired, two-tailed *t*-test with a Welch's correction. ns represents not significant ( $\Delta$ *rbmC* *bap1* $\Delta$ Velcro v.s.  $\Delta$ *rbmC* $\Delta$ *bap1*:  $p = 0.1144$ ); \*\*\*  $p < 0.001$  ( $\Delta$ *rbmC* v.s.  $\Delta$ *rbmC* *bap1* $\Delta$ Velcro:  $p = 0.0009$ ). **g**, 3D-rendering of confocal images of a biofilm from Bap1 $\Delta$ Velcro-3×FLAG cells expressing mNeonGreen with *in situ* immunostaining. **h**, Distribution of puncta size in *bap1* $\Delta$ Velcro biofilms ( $N = 200$  technical replicates). **i**, EMSA of RbmA (Left) binding to VPS, RbmC's  $\beta$ -propeller binding to VPS (Middle), and Bap1\*(= Bap1 $\Delta$ 57aa, Right) binding to selected polysaccharides. RbmA was used as a positive control in the EMSA as it is known to bind to VPS<sup>2</sup>. The protein amount per lane is 5  $\mu\text{g}$  when present. The VPS amount is 0, 0.0625, 0.125, 0.25, 0.50, 1, 5, 5, 5  $\mu\text{g}$  in each lane from left to right. For other polysaccharides, 5  $\mu\text{g}$  is used in each lane whenever present. Red arrows = protein-substrate complex, black arrows = unbound protein, green arrows = free GFP. Under the concentrations tested, we did not observe the same tight binding of Bap1 to the selected polysaccharides as seen with VPS.

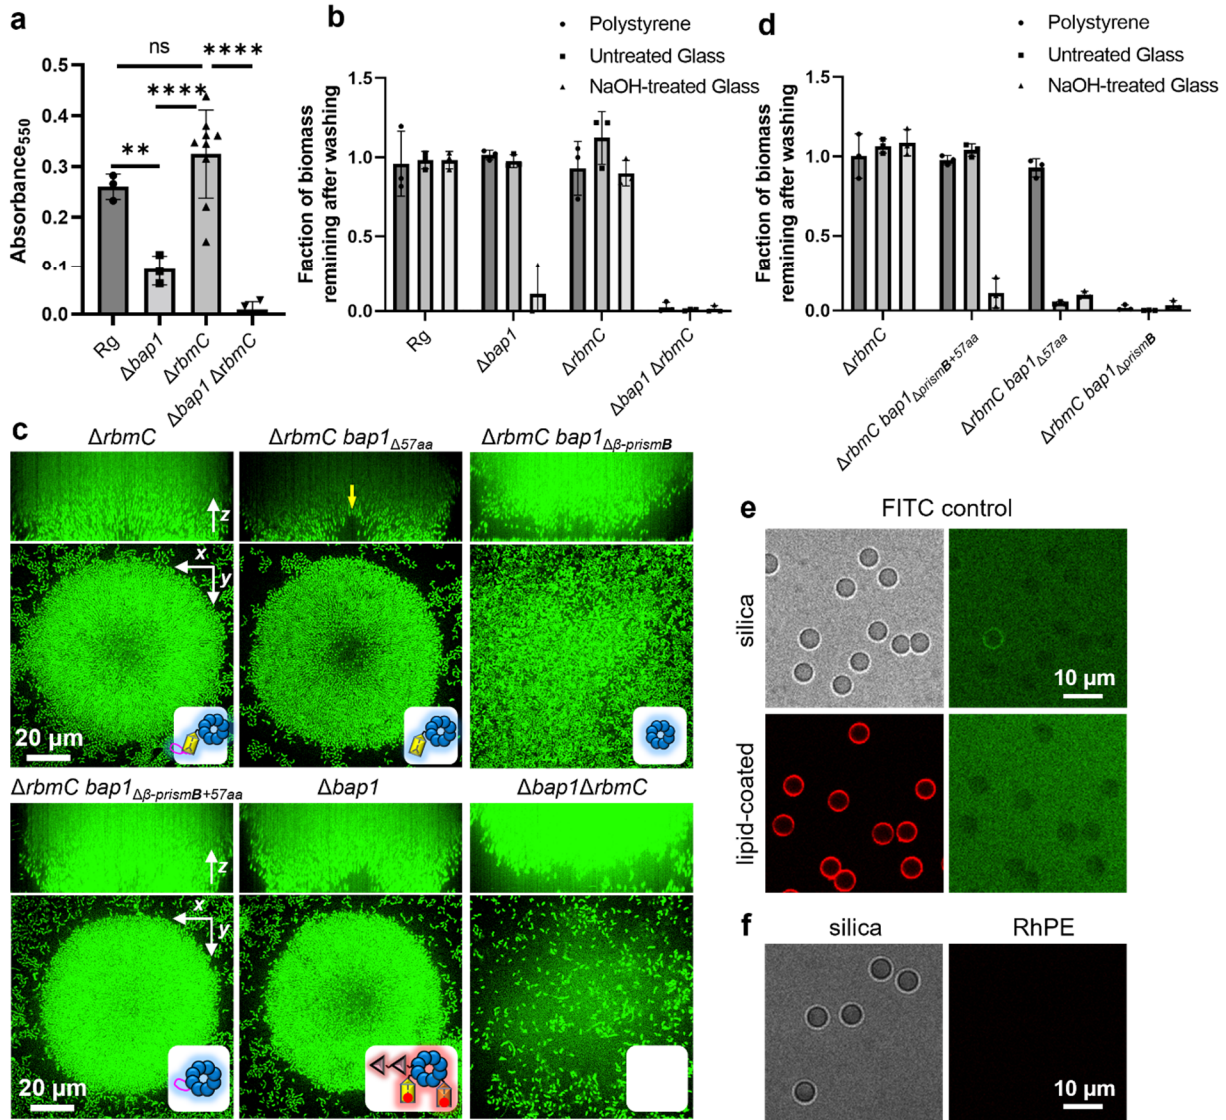

**Supplementary Figure 3 | Bap1 is the major biofilm adhesin on abiotic surfaces.** **a**, Absorbance at 550 nm in crystal violet assays for the indicated strains. Data are shown as the mean  $\pm$  SD ( $n = 3$  for rugose and  $\Delta rbmC$ ,  $n = 4$  for  $\Delta bap1\Delta rbmC$ ,  $n = 9$  for  $\Delta rbmC$ , all biologically independent samples). Statistics were performed using an unpaired, two-tailed  $t$ -test with a Welch's correction. ns represents not significant (Rg v.s.  $\Delta rbmC$ :  $p = 0.0751$ ); \*\*  $p < 0.01$  (Rg v.s.  $\Delta bap1$ :  $p = 0.0026$ ); \*\*\*\*  $p < 0.0001$ . **b**, Biofilm adhesion assays performed on polystyrene, untreated glass, or NaOH-treated glass (following an increasing order of hydrophilicity), for various mutants with a single or double deletion of *bap1* and/or *rbmC*. Data are shown as the mean  $\pm$  SD ( $n = 3$  biologically independent samples). On NaOH-treated glass that is more hydrophilic and negatively charged<sup>3</sup>, a single deletion of *bap1*, but not *rbmC*, is sufficient to lead to an adhesion defect. **c**, Representative cross-sectional views of the bottom layer and side views of different mutant biofilms. The two defective mutants  $\Delta bap1\Delta rbmC$  and  $\Delta rbmC bap1_{\Delta\beta\text{-prismB}}$  form floating clusters not attached to the surface. The  $\Delta rbmC bap1_{\Delta57aa}$  displays a hole at biofilm core (yellow arrow), indicating a slight adhesion defect. **d**, Biofilm adhesion assays performed on polystyrene, untreated glass, or NaOH-treated glass, for various *bap1* mutants in the presence of 1 mg/mL BSA. Data are shown as the

mean  $\pm$  SD ( $n = 3$  biologically independent samples). The Bap1 $\Delta\beta$ -prismB+57aa construct, although functional on bare glass, does not adhere to NaOH-treated glass, suggesting that  $\beta$ -prismB still contributes to abiotic surface adhesion to some extent. **e**, Negative control for the microbead adsorption assay. *Top*: a representative image of 5  $\mu$ m silica bead (*Left*, bright field) and FITC adsorbed on the bead (*Right*). *Bottom*: a representative image of 5  $\mu$ m silica beads coated with lipids, labeled with RhPE (*Left*) for lipids and the FITC adsorbed on lipid layer (*Right*). [FITC] = 1.5  $\mu$ M. FITC molecules adsorb minimally to these two types of surfaces. See main Figure 3f for quantification. **f**, A representative image of 5  $\mu$ m silica beads incubated with RhPE. RhPE does not adsorb onto silica surfaces unless coated with lipids. The intensity scale in **e** and **f** is the same as that in main Figure 3e.

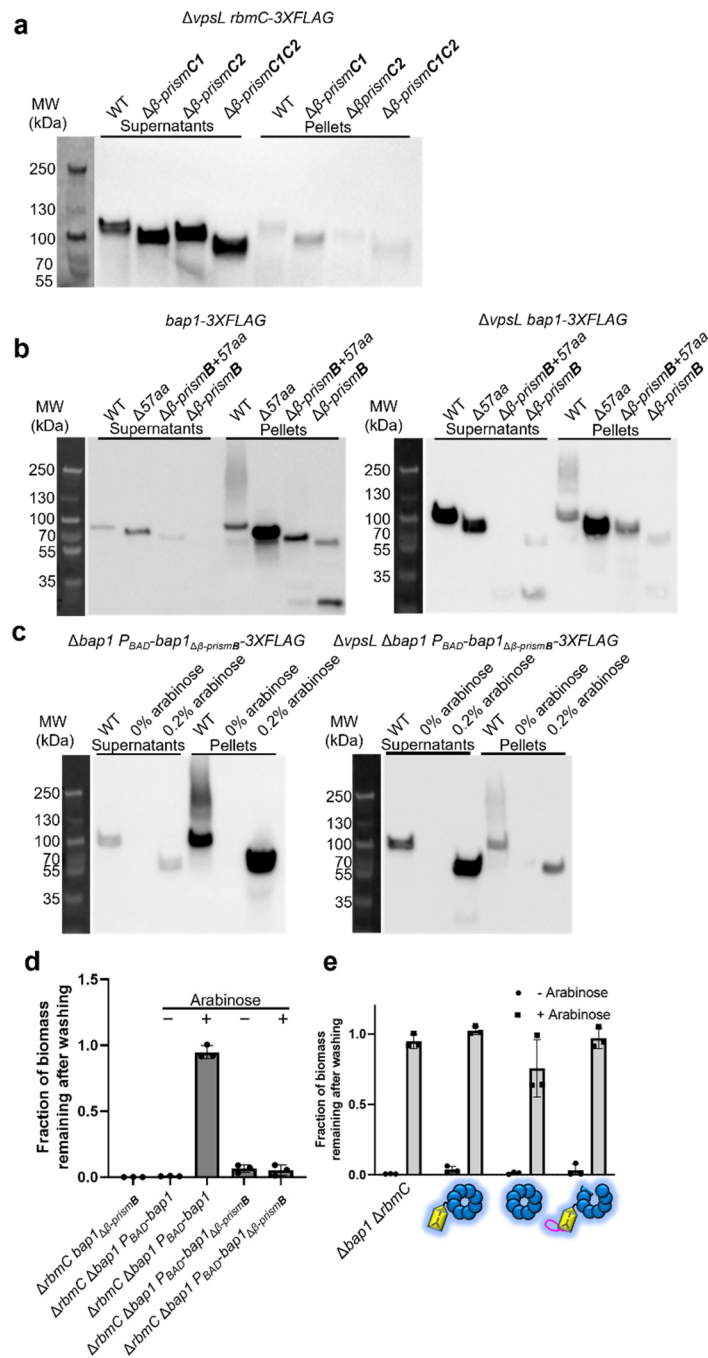

**Supplementary Figure 4 | Analysis of protein stability and secretion of Bap1 and RbmC constructs.** **a**, Western blot analysis of the production and secretion of RbmC protein constructs in  $VPS^-$  *V. cholerae* strains. All constructs are secreted into the supernatant at a level comparable to WT. **b**, Western blot analysis of the production and secretion of Bap1 protein constructs in  $VPS^+$  (Left) and  $VPS^-$  (Right) *V. cholerae* strains. Among the defective mutants,  $Bap1_{\Delta\beta\text{-prismB}}$  shows reduced intensity due to degradation and potentially also secretion. To verify that the defective phenotype seen with  $Bap1_{\Delta\beta\text{-prismB}}$  is not due to these confounding factors, we overexpressed *bap1* $\Delta\beta\text{-prismB}$  from an arabinose-inducible plasmid. **c**, Western blot analysis of induction,

production, and secretion of *bapI* $_{\Delta\beta\text{-prismB}}$ -3 $\times$ FLAG from a plasmid in the VPS<sup>+</sup> (*Left*) and VPS<sup>-</sup> (*Right*) background, with and without 0.2% arabinose. In the presence of arabinose, the level of secreted proteins is restored to a level higher to that of WT Bap1. **d**, Adhesion assay of the strain overexpressing *bapI* $_{\Delta\beta\text{-prismB}}$  in the presence of 1 mg/mL BSA. Data are shown as the mean  $\pm$  SD ( $n = 3$  biologically independent samples). Even in the presence of arabinose that leads to elevated levels of the secreted protein, *bapI* $_{\Delta\beta\text{-prismB}}$  is unable to adhere the biofilm to the glass surface, suggesting that the protein is inherently defective. **e**, Adhesion defective mutants can be complemented. Shown are results from adhesion assay (from left to right) of  $\Delta\text{rbmC}\Delta\text{bapI}$ ,  $\Delta\text{rbmC } \text{bapI}_{\Delta\text{Velcro}}$ ,  $\Delta\text{rbmC } \text{bapI}_{\Delta 57\text{aa}}$ , and  $\Delta\text{rbmC } \text{bapI}_{\Delta\beta\text{-prismB}}$  mutants with a plasmid containing P<sub>BAD</sub>-*bapI* induced with 0.2% arabinose in the presence of 1 mg/mL BSA. Data are shown as the mean  $\pm$  SD ( $n = 3$  biologically independent samples). The complementation assay validates that the defective phenotype of these strains is due to the specific mutations in Bap1.



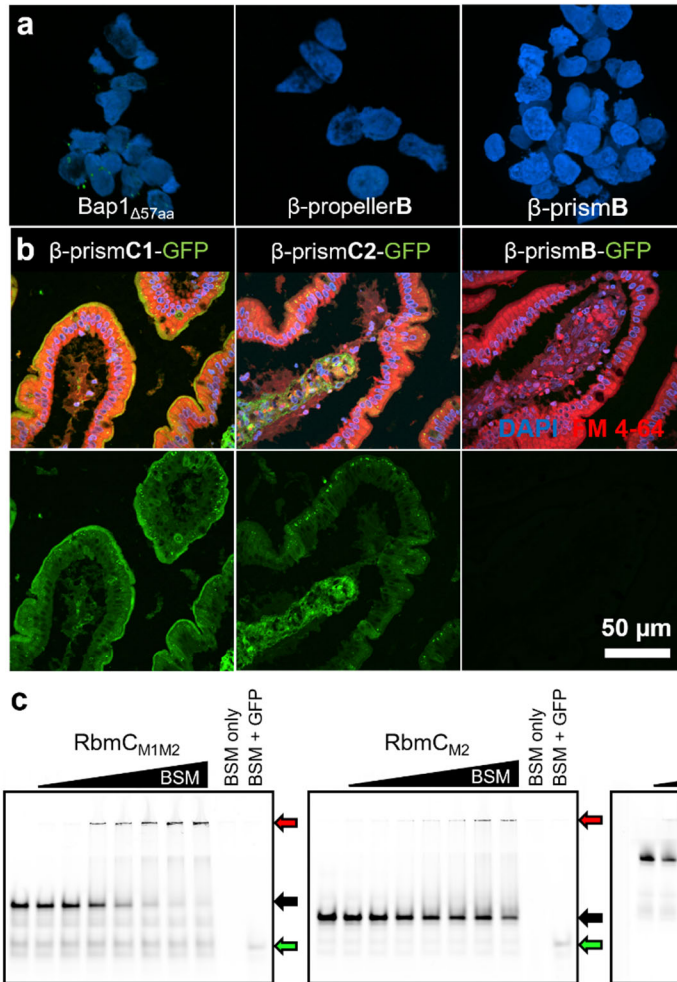

**Supplementary Figure 5 | Purified functional RbmC constructs but not Bap1 constructs bind to glycans prevalent on host surfaces. a**, Merged z-stack of confocal images of DAPI-stained Caco-2 cells incubated with 1  $\mu$ M purified and GFP-tagged Bap1 domains. The total size of each image is 80 $\times$ 80 $\times$ 32.5  $\mu$ m. The intensity scale is the same as that in Figure 4a. None of the Bap1 domain(s) shows positive staining with Caco-2 cells. **b**, Confocal images of jejunum tissue slices stained with DAPI, FM 4-64, and 1  $\mu$ M purified and GFP-tagged  $\beta$ -prismC1 (*Left*),  $\beta$ -prismC2 (*Middle*), and  $\beta$ -prismB (*Right*). **c**, EMSA of RbmC<sub>M1M2</sub> (*Left*), RbmC<sub>M2</sub> (*Middle*), or StcE<sub>C-term</sub> (*Right*) binding to bovine submaxillary mucin (BSM). The protein amount per lane is 5  $\mu$ g when present. The BSM amount is 0, 0.5, 1, 2, 4, 6, 8, 10, 10, 10  $\mu$ g in each lane from left to right. Red arrows = protein-substrate complex, black arrows = unbound protein, green arrows = free GFP.

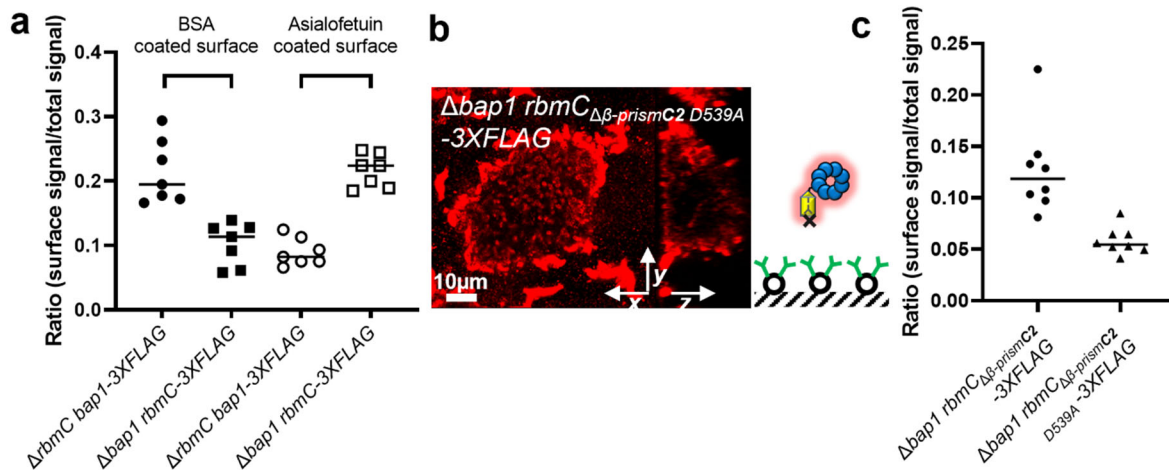

**Supplementary Figure 6 | Role of  $\beta$ -prism domains in adhering *V. cholerae* biofilms and directing adhesins to bare and functionalized glass surfaces. a**, Distribution quantification for Bap1 and RbmC in the presence of BSA or asialofetuin. Shown are the ratios between the signals of 3 $\times$ FLAG-tagged proteins at the biofilm-glass interface and the total signal integrated over the entire biofilm cluster, for each indicated strain. The relative order of the two proteins localized to the biofilm-glass interface is opposite in the two cases, showing different preferences of the two adhesins for different types of surfaces. **b-c**, Asialofetuin binding requires a functional  $\beta$ -prism. **b**, Cross-sectional image of a biofilm from  $\Delta bap1$  rbmC $\Delta\beta$ -prismC2 D539A, in which N-glycan binding was abolished due to a point mutation in a key aspartate residue in the binding pocket<sup>4</sup> (schematically shown on the right). The surface localization of RbmC signal is lost due to the loss of N-glycan binding, as quantified in panel **c**. For **a** and **c**, individual points are from different biofilms in one sample (technical replicates), and no statistics were derived.

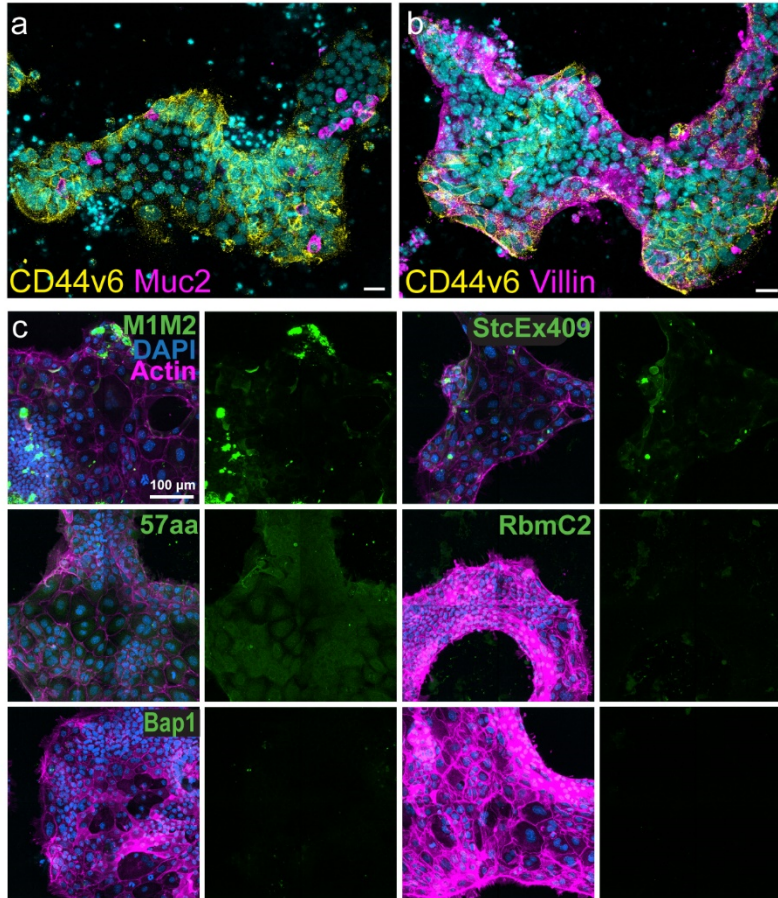

**Supplementary Figure 7 | Validation of enteroid monolayers.** Shown are maximum projection images of a representative monolayer with nuclei stained with DAPI (cyan), crypt domains stained with CD44v6 antibody (yellow), goblet cells stained with MUC2 antibody (magenta) in **a** and enterocytes stained with Villin (magenta) in **b**. Scale bars: 20 μm. **c**, Representative maximum projection images of enteroid monolayers stained with nuclei stained with DAPI (blue), an F-actin probe conjugated to Alexa Fluor™ 647 dye (magenta), and 1 μM labeled proteins. All proteins are labeled with GFP<sub>UV</sub>, and the 57aa peptide is labeled with FITC. The bottom right panel shows a control without any protein/peptide staining. Shown on the left column are the overlay images of all three fluorescent channels and on the right column are the signals in the 488 nm channel.

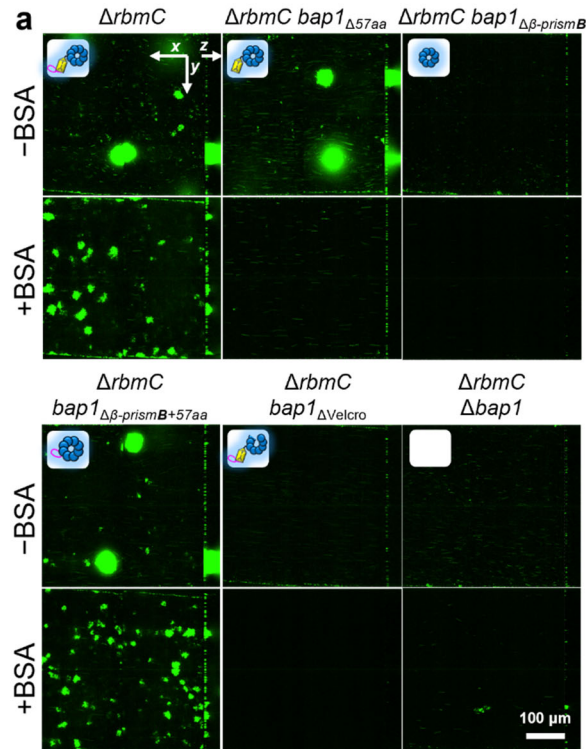

**Supplementary Figure 8 | Validation of the role of the biofilm adhesins in the wild-type background.** **a**, WT *V. cholerae* biofilms with different constructs grown in microfluidic chambers under a flow rate of 0.6  $\mu\text{L}/\text{min}$ . Shown are both cross-sectional views of biofilms at  $z = 6 \mu\text{m}$ , both in the absence (*Top*) and presence (*Bottom*) of 0.4 mg/mL BSA. **b**, Quantification of biomass for different WT biofilms (mean  $\pm$  SD,  $n$  (biologically independent samples) = 4 for  $\Delta\text{rbmC}$  and  $n = 3$  for all other mutants, two-tailed  $t$ -test with Welch's correction. \* $p < 0.05$ , \*\* $p < 0.01$ , ns = not significant).  $p$  values from left to right (in the absence of BSA): 0.8139, 0.5010, 0.0232, 0.0284, 0.0253.  $p$  values from left to right (in the presence of BSA): 0.2340, 0.0081, 0.0072, 0.0071, 0.0072. Note that the surface layer was excluded from the analysis; WT *V. cholerae* cells can attach to glass surfaces via pili and form a monolayer independent of their ability to form biofilms<sup>5</sup>.

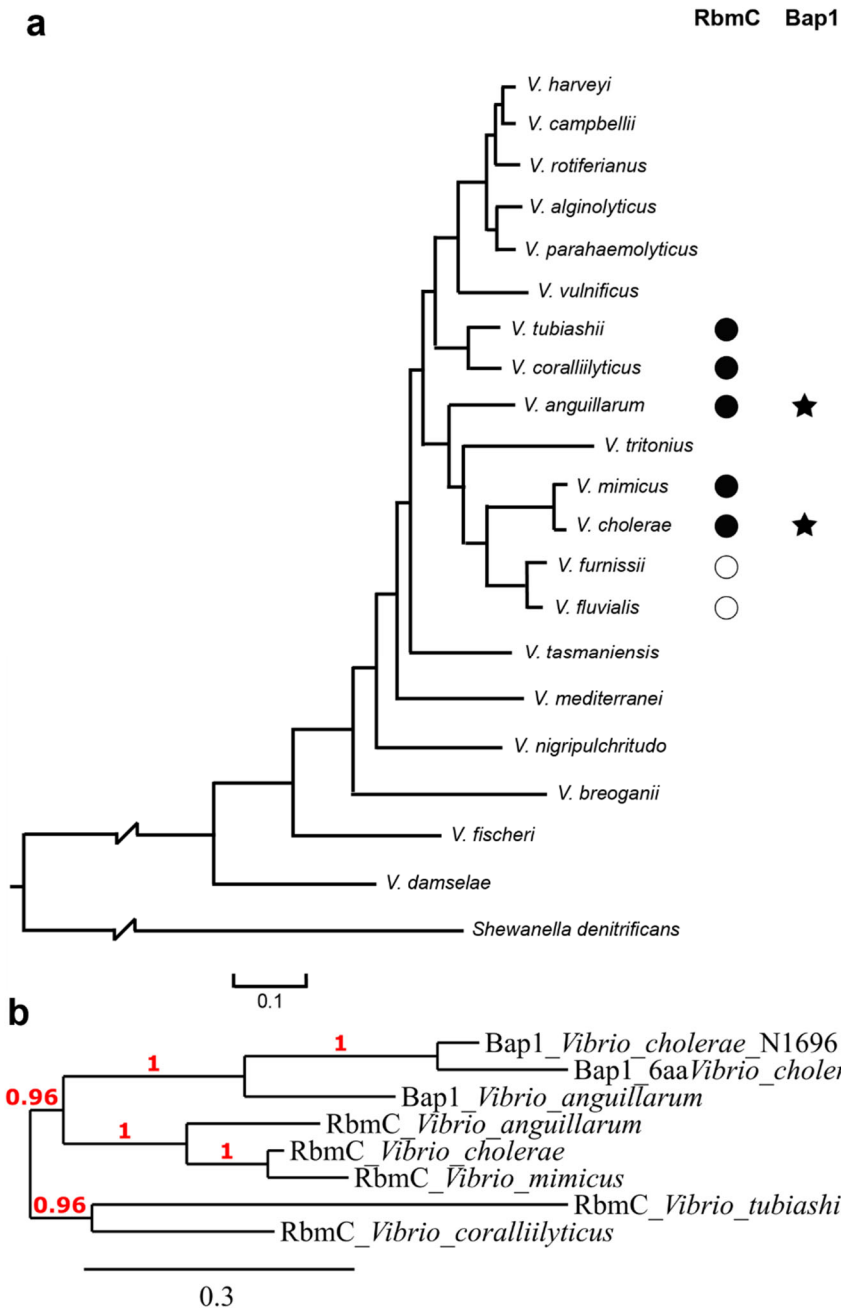

**Supplementary Figure 9 | Phylogenetic analysis of RbmC and Bap1 among Vibrio species. a,** Phylogenetic tree of 20 *Vibrio* species adapted from Ref.6, showing the distribution of RbmC/Bap1 homologues. The branch lengths are approximate. Filled circles indicate where a RbmC gene was recovered. Open circles indicate where a potential RbmC gene with low conservation was recovered. Stars indicate where Bap1 was recovered. Scale bar: the number of substitutions per site. **b,** Phylogenetic analysis of Bap1 and RbmC homologs in *Vibrio* species. Scale bar: number of amino acid substitutions per site.

**Supplementary Table 1- Strains used in this study**

| Strain Name in Manuscript                                                   | Genotype and Antibiotic Resistance                                                                                                                                                    | Description                                                                                                                                                                                                                                              | Strain# & Reference   |
|-----------------------------------------------------------------------------|---------------------------------------------------------------------------------------------------------------------------------------------------------------------------------------|----------------------------------------------------------------------------------------------------------------------------------------------------------------------------------------------------------------------------------------------------------|-----------------------|
| WT background                                                               | C6706, Sm <sup>R</sup>                                                                                                                                                                | A streptomycin-resistant variant of the WT O1 El Tor biotype C6706str2. Serves as the background for all strains reported in this manuscript                                                                                                             | JY016 <sup>7</sup>    |
| Rg background                                                               | <i>vpvC</i> <sup>W240R</sup> , Sm <sup>R</sup>                                                                                                                                        | Missense mutation in the <i>Vibrio cholerae</i> O1 El tor strain that elevates the level of cyclic-di-GMP. Rugose phenotype. Serves as the parental strain for most of the mutants in this manuscript                                                    | JY028 <sup>8</sup>    |
| <b>Strains Used for Biofilm Morphology and Adhesion Assays</b>              |                                                                                                                                                                                       |                                                                                                                                                                                                                                                          |                       |
| Rg                                                                          | <i>vpvC</i> <sup>W240R</sup> , $\Delta$ <i>VCI807::P<sub>tac</sub>-mNeonGreen</i> , Spec <sup>R</sup>                                                                                 | Rugose strain with mNeonGreen fluorescent protein inserted at a non-essential site in the genome ( <i>VCI807</i> )                                                                                                                                       | JY451 <sup>9</sup>    |
| $\Delta$ <i>bapI</i>                                                        | <i>vpvC</i> <sup>W240R</sup> , $\Delta$ <i>bapI</i> , $\Delta$ <i>VCI807::P<sub>tac</sub>-mNeonGreen</i> , Spec <sup>R</sup>                                                          | Clean deletion of <i>bapI</i> by cotransformation with $\Delta$ <i>VCI807::P<sub>tac</sub>-mNeonGreen</i> , Spec <sup>R</sup>                                                                                                                            | ZJ053, This Study     |
| $\Delta$ <i>rbmC</i>                                                        | <i>vpvC</i> <sup>W240R</sup> , $\Delta$ <i>rbmC</i> , $\Delta$ <i>VCI807::P<sub>tac</sub>-mNeonGreen</i> , Spec <sup>R</sup>                                                          | Clean deletion of <i>rbmC</i> by cotransformation with $\Delta$ <i>VCI807::P<sub>tac</sub>-mNeonGreen</i> , Spec <sup>R</sup>                                                                                                                            | STN0011, This Study   |
| $\Delta$ <i>vpsL</i>                                                        | <i>vpvC</i> <sup>W240R</sup> , $\Delta$ <i>vpsL</i> , $\Delta$ <i>VCI807::P<sub>tac</sub>-mNeonGreen</i> , Spec <sup>R</sup>                                                          | Clean deletion of <i>vpsL</i> by cotransformation with $\Delta$ <i>VCI807::P<sub>tac</sub>-mNeonGreen</i> , Spec <sup>R</sup>                                                                                                                            | JY466, This Study     |
| $\Delta$ <i>bapI</i> $\Delta$ <i>rbmC</i>                                   | <i>vpvC</i> <sup>W240R</sup> , $\Delta$ <i>bapI</i> , $\Delta$ <i>rbmC</i> , $\Delta$ <i>VCI807::P<sub>tac</sub>-mNeonGreen</i> , Spec <sup>R</sup>                                   | Clean deletion of <i>rbmC</i> by cotransformation with $\Delta$ <i>VCI807::P<sub>tac</sub>-mNeonGreen</i> , Spec <sup>R</sup> into a rugose strain lacking <i>bapI</i> (JY074)                                                                           | STN0009 <sup>10</sup> |
| $\Delta$ <i>rbmC</i> <i>bapI</i> <sub><math>\Delta\beta</math>-prismB</sub> | <i>vpvC</i> <sup>W240R</sup> , $\Delta$ <i>rbmC</i> , <i>bapI</i> <sub><math>\Delta\beta</math>-prismB</sub> , $\Delta$ <i>VCI807::P<sub>tac</sub>-mNeonGreen</i> , Spec <sup>R</sup> | Replacement of <i>bapI</i> <sup>WT</sup> with a <i>bapI</i> construct lacking the $\beta$ -prism domain by cotransformation with $\Delta$ <i>VCI807::P<sub>tac</sub>-mNeonGreen</i> , Spec <sup>R</sup> into a rugose strain lacking <i>rbmC</i> (JY071) | ZJ074, This Study     |

|                                                                             |                                                                                                                                                                 |                                                                                                                                                                                                                   |                     |
|-----------------------------------------------------------------------------|-----------------------------------------------------------------------------------------------------------------------------------------------------------------|-------------------------------------------------------------------------------------------------------------------------------------------------------------------------------------------------------------------|---------------------|
| $\Delta rbmC$ $bapI_{\Delta 57aa}$                                          | $vpvC^{W240R}$ , $\Delta rbmC$ , $bapI_{\Delta 57aa}$ , $\Delta VCI807::P_{tac^-}$ $mNeonGreen$ , $Spec^R$                                                      | Replacement of $bapI^{WT}$ with a $bapI$ construct lacking the 57aa by cotransformation with $\Delta VCI807::P_{tac^-}mNeonGreen$ , $Spec^R$ into a rugose strain lacking $rbmC$ (JY071)                          | ZJ032, This Study   |
| $\Delta rbmC$ $bapI_{\Delta\beta}$ -<br>$prismB+57aa$                       | $vpvC^{W240R}$ , $\Delta rbmC$ , $bapI_{\Delta\beta}$ -<br>$prismB+57aa$ , $\Delta VCI807::P_{tac^-}$ $mNeonGreen$ , $Spec^R$                                   | Replacement of $bapI^{WT}$ with a $bapI$ construct lacking the prism but with remaining 57aa by cotransformation with $\Delta VCI807::P_{tac^-}mNeonGreen$ , $Spec^R$ into a rugose strain lacking $rbmC$ (JY071) | ZJ087, This Study   |
| $\Delta rbmC$<br>$bapI_{\Delta Velcro}$                                     | $vpvC^{W240R}$ , $\Delta rbmC$ , $bapI_{\Delta Velcro}$ , $\Delta VCI807::P_{tac^-}$ $mNeonGreen$ , $Spec^R$                                                    | Replacement of $bapI^{WT}$ with a $bapI$ construct lacking the Velcro by cotransformation with $\Delta VCI807::P_{tac^-}mNeonGreen$ , $Spec^R$ into a rugose strain lacking $rbmC$ (JY071)                        | XH031, This Study   |
| $\Delta rbmC$ $bapI_{\Delta\beta}$ -<br>$propellerB$                        | $vpvC^{W240R}$ , $\Delta rbmC$ , $bapI_{\Delta\beta}$ -<br>$propellerB$ , $\Delta VCI807::P_{tac^-}$ $mNeonGreen$ , $Spec^R$                                    | Replacement of $bapI^{WT}$ with a $bapI$ construct lacking the $\beta$ -propeller domain by cotransformation with $\Delta VCI807::P_{tac^-}mNeonGreen$ , $Spec^R$ into a rugose strain lacking $rbmC$ (JY071)     | XH001, This Study   |
| $\Delta rbmC$ $\Delta bapI$<br>$+P_{BAD^-}bapI_{\Delta\beta}$ -<br>$prismB$ | $pEVS(P_{BAD^-} bapI_{\Delta\beta}$ - $prismB$ , $Kan^R$ ), $vpvC^{W240R}$ , $\Delta rbmC$ , $\Delta bapI$ , $\Delta VCI807::P_{tac^-}$ $mNeonGreen$ , $Spec^R$ | $pEVS$ containing $bapI_{\Delta\beta}$ - $prismB$ with an arabinose inducible promoter was mated into the indicated strain for overexpression                                                                     | XH088, This Study   |
| $\Delta bapI$ $rbmC_{\Delta\beta}$ -<br>$prismC1$                           | $vpvC^{W240R}$ , $\Delta bapI$ , $rbmC_{\Delta\beta}$ -<br>$prismC1$ , $\Delta VCI807::P_{tac^-}$ $mNeonGreen$ , $Spec^R$                                       | Replacement of $rbmC^{WT}$ with a $rbmC$ construct lacking the first $\beta$ -prism domain by cotransformation with $\Delta VCI807::P_{tac^-}mNeonGreen$ , $Spec^R$ into a rugose strain lacking $bapI$ (JY074)   | STN0014, This Study |
| $\Delta bapI$ $rbmC_{\Delta\beta}$ -<br>$prismC2$                           | $vpvC^{W240R}$ , $\Delta bapI$ , $rbmC_{\Delta\beta}$ -<br>$prismC2$ , $\Delta VCI807::P_{tac^-}$ $mNeonGreen$ , $Spec^R$                                       | Replacement of $rbmC^{WT}$ with a $rbmC$ construct lacking the second $\beta$ -prism domain by cotransformation with $\Delta VCI807::P_{tac^-}mNeonGreen$ , $Spec^R$ into a rugose strain lacking $bapI$ (JY074)  | STN0015, This Study |
| $\Delta bapI$ $rbmC_{\Delta\beta}$ -<br>$prismC1C2$                         | $vpvC^{W240R}$ , $\Delta bapI$ , $rbmC_{\Delta\beta}$ -<br>$prismC1C2$ , $\Delta VCI807::P_{tac^-}$ $mNeonGreen$ , $Spec^R$                                     | Replacement of $rbmC^{WT}$ with a $rbmC$ construct lacking both $\beta$ -prism domains by cotransformation with $\Delta VCI807::P_{tac^-}mNeonGreen$ , $Spec^R$ into a rugose strain lacking $bapI$ (JY074)       | STN0024, This Study |

|                                                       |                                                                                                                   |                                                                                                                                                                                                                                                                                                                                                                         |                        |
|-------------------------------------------------------|-------------------------------------------------------------------------------------------------------------------|-------------------------------------------------------------------------------------------------------------------------------------------------------------------------------------------------------------------------------------------------------------------------------------------------------------------------------------------------------------------------|------------------------|
| $\Delta bap1$ $rbmC_{\Delta M1M2}$                    | $vpvC^{W240R}$ , $\Delta bap1$ ,<br>$rbmC_{\Delta M1M2}$ , $\Delta VCI807::P_{tac^-}$ -<br>$mNeonGreen$ , $Kan^R$ | Replacement of $rbmC^{WT}$ with a $rbmC$ construct lacking the M1M2 domain by cotransformation with $\Delta VCI807::P_{tac^-}mNeonGreen$ , $Spec^R$ into a rugose strain (JY028). Strain was conjugated with a plasmid containing a clean $bap1$ deletion (pJY53). Due to weak fluorescence, strain was transformed with $\Delta VCI807::P_{tac^-}mNeonGreen$ , $Kan^R$ | SKH0058,<br>This Study |
| WT $\Delta rbmC$                                      | $\Delta rbmC$ , $\Delta VCI807::P_{tac^-}$ -<br>$mNeonGreen$ , $Spec^R$                                           | Transformation with $\Delta VCI807::P_{tac^-}mNeonGreen$ , $Spec^R$ into a WT strain lacking $rbmC$ (JY063)                                                                                                                                                                                                                                                             | XH120,<br>This Study   |
| WT $\Delta rbmC$<br>$\Delta bap1$                     | $\Delta rbmC$ , $\Delta bap1$ ,<br>$\Delta VCI807::P_{tac^-}$ -<br>$mNeonGreen$ , $Spec^R$                        | Transformation with $\Delta VCI807::P_{tac^-}mNeonGreen$ , $Spec^R$ into a WT strain lacking $bap1$ and $rbmC$ (JY067)                                                                                                                                                                                                                                                  | XH121,<br>This Study   |
| WT $\Delta rbmC$<br>$bap1_{\Delta 57aa}$              | $\Delta rbmC$ , $bap1_{\Delta 57aa}$ ,<br>$\Delta VCI807::P_{tac^-}$ -<br>$mNeonGreen$ , $Kan^R$                  | Converting rugose strain to WT background by cotransformation of WT $vpvc$ locus with $\Delta VCI807::P_{tac^-}mNeonGreen$ , $Kan^R$ into a rugose strain lacking $57aa$ (ZJ32)                                                                                                                                                                                         | XH112,<br>This Study   |
| WT $\Delta rbmC$<br>$bap1_{\Delta \beta-prismB+57aa}$ | $\Delta rbmC$ , $bap1_{\Delta \beta-prismB+57aa}$ ,<br>$\Delta VCI807::P_{tac^-}$ -<br>$mNeonGreen$ , $Kan^R$     | Converting rugose strain to WT background by cotransformation of WT $vpvc$ locus with $\Delta VCI807::P_{tac^-}mNeonGreen$ , $Kan^R$ into a rugose strain lacking $\beta-prismB+57aa$ (ZJ87)                                                                                                                                                                            | XH113,<br>This Study   |
| WT $\Delta rbmC$<br>$bap1_{\Delta \beta-prismB}$      | $\Delta rbmC$ , $bap1_{\Delta \beta-prismB}$ ,<br>$\Delta VCI807::P_{tac^-}$ -<br>$mNeonGreen$ , $Kan^R$          | Converting rugose strain to WT background by cotransformation of WT $vpvc$ locus with $\Delta VCI807::P_{tac^-}mNeonGreen$ , $Kan^R$ into a rugose strain lacking $\beta-prismB$ (XH58)                                                                                                                                                                                 | XH114,<br>This Study   |



|                                                                   |                                                                                                                                    |                                                                                                                                                                                                                                                    |                      |
|-------------------------------------------------------------------|------------------------------------------------------------------------------------------------------------------------------------|----------------------------------------------------------------------------------------------------------------------------------------------------------------------------------------------------------------------------------------------------|----------------------|
| WT $\Delta rbmC$<br>$bap1_{\Delta Velcro}$                        | $\Delta rbmC$ , $bap1_{\Delta Velcro}$ ,<br>$\Delta VCI807::P_{tac-}$<br>$mNeonGreen$ , Kan <sup>R</sup>                           | Converting rugose strain to WT background by cotransformation of WT $vpvc$ locus with $\Delta VCI807::P_{tac-} mNeonGreen$ , Kan <sup>R</sup> into a rugose strain lacking <i>Velcro</i> (XH31)                                                    | XH115,<br>This Study |
| <b>Strains Used for <i>in situ</i> Staining and Western Blots</b> |                                                                                                                                    |                                                                                                                                                                                                                                                    |                      |
| $bap1$ -3XFLAG                                                    | $vpvC^{W240R}$ , $bap1$ -3XFLAG,<br>$\Delta VCI807::P_{tac-}$<br>$mNeonGreen$ , Spec <sup>R</sup>                                  | 3XFLAG tagged Bap1                                                                                                                                                                                                                                 | JY488 <sup>9</sup>   |
| $rbmC$ -3XFLAG                                                    | $vpvC^{W240R}$ , $rbmC$ -3XFLAG,<br>$\Delta VCI807::P_{tac-}$<br>$mNeonGreen$ , Spec <sup>R</sup>                                  | 3XFLAG tagged RbmC                                                                                                                                                                                                                                 | JY489 <sup>9</sup>   |
| $\Delta rbmC$ $bap1$ -3XFLAG                                      | $vpvC^{W240R}$ , $\Delta rbmC$ , $bap1$ -3XFLAG,<br>$\Delta VCI807::P_{tac-}$<br>$mNeonGreen$ , Spec <sup>R</sup>                  | 3XFLAG tagged Bap1 with $rbmC$ deleted                                                                                                                                                                                                             | ZJ065, This Study    |
| $\Delta bap1$ $rbmC$ -3XFLAG                                      | $vpvC^{W240R}$ , $\Delta bap1$ , $rbmC$ -3XFLAG,<br>$\Delta VCI807::P_{tac-}$<br>$mNeonGreen$ , Spec <sup>R</sup>                  | 3XFLAG tagged RbmC with $bap1$ deleted                                                                                                                                                                                                             | ZJ066, This Study    |
| $bap1_{\Delta\beta\text{-prismB}}$ -3XFLAG                        | $vpvC^{W240R}$ , $bap1_{\Delta\beta\text{-prismB}}$ -3XFLAG,<br>$\Delta VCI807::P_{tac-}$<br>$mNeonGreen$ , Spec <sup>R</sup>      | Replacement of $bap1^{WT}$ with a $bap1$ construct lacking the $\beta$ -prism and containing a C-terminal 3XFLAG tag by cotransformation with $\Delta VCI807::P_{tac-} mNeonGreen$ , Spec <sup>R</sup> into a rugose strain (JY028)                | ZJ091, This Study    |
| $bap1_{\Delta 57aa}$ -3XFLAG                                      | $vpvC^{W240R}$ , $bap1_{\Delta 57aa}$ -3XFLAG,<br>$\Delta VCI807::P_{tac-}$<br>$mNeonGreen$ , Spec <sup>R</sup>                    | Replacement of $bap1^{WT}$ with a $bap1$ construct lacking the 57aa and containing a C-terminal 3XFLAG tag by cotransformation with $\Delta VCI807::P_{tac-} mNeonGreen$ , Spec <sup>R</sup> into a rugose strain (JY028)                          | ZJ036, This Study    |
| $bap1_{\Delta\beta\text{-prismB}+57aa}$ -3XFLAG                   | $vpvC^{W240R}$ , $bap1_{\Delta\beta\text{-prismB}+57aa}$ -3XFLAG,<br>$\Delta VCI807::P_{tac-}$<br>$mNeonGreen$ , Spec <sup>R</sup> | Replacement of $bap1^{WT}$ with a $bap1$ construct lacking the prism but with remaining 57aa and containing a C-terminal 3XFLAG tag by cotransformation with $\Delta VCI807::P_{tac-} mNeonGreen$ , Spec <sup>R</sup> into a rugose strain (JY028) | XH024,<br>This Study |

|                                                                                  |                                                                                                                                                                                            |                                                                                                                                                                                                                                                                                                     |                   |
|----------------------------------------------------------------------------------|--------------------------------------------------------------------------------------------------------------------------------------------------------------------------------------------|-----------------------------------------------------------------------------------------------------------------------------------------------------------------------------------------------------------------------------------------------------------------------------------------------------|-------------------|
| <i>bap1</i> <sub>ΔVelcro</sub> -3XFLAG                                           | <i>vpvC</i> <sup>W240R</sup> , <i>bap1</i> <sub>ΔVelcro</sub> -3XFLAG, Δ <i>VC1807::P</i> <sub>tac</sub> - <i>mNeonGreen</i> , Spec <sup>R</sup>                                           | Replacement of <i>bap1</i> <sup>WT</sup> with a <i>bap1</i> construct lacking the Velcro and containing a C-terminal 3XFLAG tag by cotransformation with Δ <i>VC1807::P</i> <sub>tac</sub> - <i>mNeonGreen</i> , Spec <sup>R</sup> into a rugose strain (JY028)                                     | XH041, This Study |
| <i>bap1</i> <sub>Δβ-propellerB</sub> -3XFLAG                                     | <i>vpvC</i> <sup>W240R</sup> , <i>bap1</i> <sub>Δβ-propellerB</sub> -3XFLAG, Δ <i>VC1807::P</i> <sub>tac</sub> - <i>mNeonGreen</i> , Spec <sup>R</sup>                                     | Replacement of <i>bap1</i> <sup>WT</sup> with a <i>bap1</i> construct lacking the β-propeller domain and containing a C-terminal 3XFLAG tag by cotransformation with Δ <i>VC1807::P</i> <sub>tac</sub> - <i>mNeonGreen</i> , Spec <sup>R</sup> into a rugose strain (JY028)                         | XH003, This Study |
| Δ <i>hapA</i> Δ <i>ivaP</i> <i>bap1</i> <sub>ΔVelcro</sub> -3XFLAG               | <i>vpvC</i> <sup>W240R</sup> , Δ <i>hapA</i> , Δ <i>ivaP</i> , <i>bap1</i> <sub>ΔVelcro</sub> -3XFLAG, Δ <i>VC1807::P</i> <sub>tac</sub> - <i>mNeonGreen</i> , Spec <sup>R</sup>           | Replacement of <i>bap1</i> <sup>WT</sup> with a <i>bap1</i> construct lacking the Velcro and containing a C-terminal 3XFLAG tag by cotransformation with Δ <i>VC1807::P</i> <sub>tac</sub> - <i>mNeonGreen</i> , Spec <sup>R</sup> into a rugose strain lacking <i>hapA</i> and <i>ivaP</i> (JY231) | XH057, This Study |
| Δ <i>vpsL</i> <i>bap1</i> -3XFLAG                                                | <i>vpvC</i> <sup>W240R</sup> , Δ <i>vpsL</i> , <i>bap1</i> -3XFLAG, Δ <i>VC1807::P</i> <sub>tac</sub> - <i>mNeonGreen</i> , Spec <sup>R</sup>                                              | <i>vpsL</i> was deleted in the indicated strain for Western Blots                                                                                                                                                                                                                                   | ZJ063, This Study |
| Δ <i>vpsL</i> <i>bap1</i> <sub>Δβ-propeller</sub> -3XFLAG                        | <i>vpvC</i> <sup>W240R</sup> , Δ <i>vpsL</i> , <i>bap1</i> <sub>Δβ-propeller</sub> -3XFLAG, Δ <i>VC1807::P</i> <sub>tac</sub> - <i>mRuby</i> , Kan <sup>R</sup>                            | <i>vpsL</i> was deleted in the indicated strain for Western Blots                                                                                                                                                                                                                                   | XH010, This Study |
| Δ <i>vpsL</i> <i>bap1</i> <sub>Δ57aa</sub> -3XFLAG                               | <i>vpvC</i> <sup>W240R</sup> , Δ <i>vpsL</i> , <i>bap1</i> <sub>Δ57aa</sub> -3XFLAG, Δ <i>VC1807::P</i> <sub>tac</sub> - <i>mRuby</i> , Kan <sup>R</sup>                                   | <i>vpsL</i> was deleted in the indicated strain for Western Blots                                                                                                                                                                                                                                   | XH014, This Study |
| Δ <i>vpsL</i> <i>bap1</i> <sub>Δβ-prismB+57aa</sub> -3XFLAG                      | <i>vpvC</i> <sup>W240R</sup> , Δ <i>vpsL</i> , <i>bap1</i> <sub>Δβ-prismB+57aa</sub> -3XFLAG, Δ <i>VC1807::P</i> <sub>tac</sub> - <i>mRuby</i> , Kan <sup>R</sup>                          | <i>vpsL</i> was deleted in the indicated strain for Western Blots                                                                                                                                                                                                                                   | XH027, This Study |
| Δ <i>vpsL</i> <i>bap1</i> <sub>Δβ-prismB</sub> -3XFLAG                           | <i>vpvC</i> <sup>W240R</sup> , Δ <i>vpsL</i> , <i>bap1</i> <sub>Δβ-prismB</sub> -3XFLAG, Δ <i>VC1807::P</i> <sub>tac</sub> - <i>mRuby</i> , Kan <sup>R</sup>                               | <i>vpsL</i> was deleted in the indicated strain for Western Blots                                                                                                                                                                                                                                   | XH052, This Study |
| Δ <i>vpsL</i> <i>bap1</i> <sub>ΔVelcro</sub> -3XFLAG                             | <i>vpvC</i> <sup>W240R</sup> , Δ <i>vpsL</i> , <i>bap1</i> <sub>ΔVelcro</sub> -3XFLAG, Δ <i>VC1807::P</i> <sub>tac</sub> - <i>mRuby</i> , Kan <sup>R</sup>                                 | <i>vpsL</i> was deleted in the indicated strain for Western Blots                                                                                                                                                                                                                                   | XH046, This Study |
| Δ <i>vpsL</i> Δ <i>hapA</i> Δ <i>ivaP</i> <i>bap1</i> <sub>ΔVelcro</sub> -3XFLAG | <i>vpvC</i> <sup>W240R</sup> , Δ <i>hapA</i> , Δ <i>ivaP</i> , Δ <i>vpsL</i> , <i>bap1</i> <sub>ΔVelcro</sub> -3XFLAG, Δ <i>VC1807::P</i> <sub>tac</sub> - <i>mRuby</i> , Kan <sup>R</sup> | <i>vpsL</i> was deleted in the indicated strain for Western Blots                                                                                                                                                                                                                                   | XH061, This Study |

|                                                                                           |                                                                                                                                                                                                                    |                                                                                                                                                                                                                                                                                                            |                        |
|-------------------------------------------------------------------------------------------|--------------------------------------------------------------------------------------------------------------------------------------------------------------------------------------------------------------------|------------------------------------------------------------------------------------------------------------------------------------------------------------------------------------------------------------------------------------------------------------------------------------------------------------|------------------------|
| <i>ΔhapA ΔivaP</i><br><i>bap1<sub>ΔVelcroΔ57aa</sub>-3XFLAG</i>                           | <i>vpvC<sup>W240R</sup>, ΔhapA, ΔivaP,</i><br><i>bap1<sub>ΔVelcroΔ57aa</sub>-3XFLAG,</i><br><i>ΔVC1807::P<sub>tac</sub>-</i><br><i>mNeonGreen, Spec<sup>R</sup></i>                                                | Replacement of <i>bap1<sup>WT</sup></i> with a <i>bap1</i> construct lacking the Velcro and the 57aa and containing a C-terminal 3XFLAG tag by cotransformation with <i>ΔVC1807::P<sub>tac</sub>-mNeonGreen</i> , <i>Spec<sup>R</sup></i> into a rugose strain lacking <i>hapA</i> and <i>ivaP</i> (JY231) | STN0060,<br>This Study |
| <i>Δbap1 + P<sub>BAD</sub>-</i><br><i>bap1<sub>Δβ-prismB</sub>-</i><br><i>3XFLAG</i>      | <i>pEVS(P<sub>BAD</sub>-bap1<sub>Δβ-prismB</sub>-</i><br><i>3XFLAG, Kan<sup>R</sup>),</i><br><i>vpvC<sup>W240R</sup>, Δbap1,</i><br><i>ΔVC1807::P<sub>tac</sub>-</i><br><i>mNeonGreen, Spec<sup>R</sup></i>        | <i>pEVS</i> containing <i>bap1<sub>Δβ-prismB</sub>-3XFLAG</i> with an arabinose inducible promoter was mated into the indicated strain for overexpression                                                                                                                                                  | XH081,<br>This Study   |
| <i>ΔvpsL Δbap1</i><br><i>+ P<sub>BAD</sub>-bap1<sub>Δβ-</sub></i><br><i>prismB-3XFLAG</i> | <i>pEVS(P<sub>BAD</sub>-bap1<sub>Δβ-prismB</sub>-</i><br><i>3XFLAG, Kan<sup>R</sup>),</i><br><i>vpvC<sup>W240R</sup>, ΔvpsL, Δbap1,</i><br><i>ΔVC1807::P<sub>tac</sub>-</i><br><i>mNeonGreen, Spec<sup>R</sup></i> | <i>vpsL</i> was deleted in the indicated strain for Western Blots                                                                                                                                                                                                                                          | XH082,<br>This Study   |
| <i>Δbap1 rbmC<sub>Δβ-</sub></i><br><i>prismC1-3XFLAG</i>                                  | <i>vpvC<sup>W240R</sup>, Δbap1, rbmC<sub>Δβ-</sub></i><br><i>prismC1-3XFLAG,</i><br><i>ΔVC1807::P<sub>tac</sub>-</i><br><i>mNeonGreen, Spec<sup>R</sup></i>                                                        | Replacement of <i>rbmC<sup>WT</sup></i> with a <i>rbmC</i> construct lacking the first β-prism domain and containing a C-terminal 3XFLAG tag by cotransformation with <i>ΔVC1807::P<sub>tac</sub>-mNeonGreen</i> , <i>Spec<sup>R</sup></i> into a rugose strain lacking <i>bap1</i> (JY074)                | STN0049,<br>This Study |
| <i>Δbap1 rbmC<sub>Δβ-</sub></i><br><i>prismC2-3XFLAG</i>                                  | <i>vpvC<sup>W240R</sup>, Δbap1, rbmC<sub>Δβ-</sub></i><br><i>prismC2-3XFLAG,</i><br><i>ΔVC1807::P<sub>tac</sub>-</i><br><i>mNeonGreen, Spec<sup>R</sup></i>                                                        | Replacement of <i>rbmC<sup>WT</sup></i> with a <i>rbmC</i> construct lacking the second β-prism domain and containing a C-terminal 3XFLAG tag by cotransformation with <i>ΔVC1807::P<sub>tac</sub>-mNeonGreen</i> , <i>Spec<sup>R</sup></i> into a rugose strain lacking <i>bap1</i> (JY074)               | STN0050,<br>This Study |
| <i>Δbap1 rbmC<sub>Δβ-</sub></i><br><i>prismC1C2-3XFLAG</i>                                | <i>vpvC<sup>W240R</sup>, Δbap1, rbmC<sub>Δβ-</sub></i><br><i>prismC1C2-3XFLAG,</i><br><i>ΔVC1807::P<sub>tac</sub>-</i><br><i>mNeonGreen, Spec<sup>R</sup></i>                                                      | Replacement of <i>rbmC<sup>WT</sup></i> with a <i>rbmC</i> construct lacking both β-prism domains and containing a C-terminal 3XFLAG tag by cotransformation with <i>ΔVC1807::P<sub>tac</sub>-mNeonGreen</i> , <i>Spec<sup>R</sup></i> into the wildtype rugose strain (JY28)                              | STN0037,<br>This Study |
| <i>ΔvpsL rbmC-</i><br><i>3XFLAG</i>                                                       | <i>vpvC<sup>W240R</sup>, ΔvpsL, rbmC-</i><br><i>3XFLAG, ΔVC1807::P<sub>tac</sub>-</i><br><i>mTFP</i>                                                                                                               | <i>vpsL</i> was deleted in the indicated strain for Western Blots                                                                                                                                                                                                                                          | JY167 <sup>8</sup>     |
| <i>ΔvpsL rbmC<sub>Δβ-</sub></i><br><i>prismC1-3XFLAG</i>                                  | <i>vpvC<sup>W240R</sup>, ΔvpsL, Δbap1,</i><br><i>rbmC<sub>Δβ-prismC1</sub>-3XFLAG,</i><br><i>ΔVC1807::P<sub>tac</sub>-</i><br><i>mNeonGreen, Spec<sup>R</sup></i>                                                  | <i>vpsL</i> was deleted in the indicated strain for Western Blots                                                                                                                                                                                                                                          | STN0019,<br>This Study |

|                                                                       |                                                                                                                                                                         |                                                                                                                       |                     |
|-----------------------------------------------------------------------|-------------------------------------------------------------------------------------------------------------------------------------------------------------------------|-----------------------------------------------------------------------------------------------------------------------|---------------------|
| $\Delta vpsL$ $rbmC_{\Delta\beta}$ - $prismC2$ -3XFLAG                | $vpvC^{W240R}$ , $\Delta vpsL$ , $\Delta bapI$ ,<br>$rbmC_{\Delta\beta}$ - $prismC2$ -3XFLAG,<br>$\Delta VCI807::P_{tac}$ -<br>$mNeonGreen$ , $Spec^R$                  | $vpsL$ was deleted in the indicated strain for Western Blots                                                          | STN0023, This Study |
| $\Delta vpsL$ $rbmC_{\Delta\beta}$ - $prismC1C2$ -3XFLAG              | $vpvC^{W240R}$ , $\Delta vpsL$ , $\Delta bapI$ ,<br>$rbmC_{\Delta\beta}$ - $prismC1C2$ -3XFLAG,<br>$\Delta VCI807::P_{tac}$ -<br>$mNeonGreen$ , $Spec^R$                | $vpsL$ was deleted in the indicated strain for Western Blots                                                          | STN0026, This Study |
| $\Delta vpsL$ $rbmC_{\Delta\beta}$ - $propeller$ -3XFLAG              | $vpvC^{W240R}$ , $\Delta vpsL$ , $\Delta bapI$ ,<br>$rbmC_{\Delta\beta}$ - $propeller$ -3XFLAG,<br>$\Delta VCI807::P_{tac}$ -<br>$mNeonGreen$ , $Spec^R$                | $vpsL$ was deleted in the indicated strain for Western Blots                                                          | STN0020, This Study |
| <b>Strains used for Complementation Assays</b>                        |                                                                                                                                                                         |                                                                                                                       |                     |
| $\Delta rbmC$ $\Delta bapI$<br>+ $P_{BAD}$ - $bapI$                   | $pEVS$ ( $P_{BAD}$ - $bapI$ , $Kan^R$ ),<br>$vpvC^{W240R}$ , $\Delta rbmC$ , $\Delta bapI$ ,<br>$\Delta VCI807::P_{tac}$ -<br>$mNeonGreen$ , $Spec^R$                   | $pEVS$ containing $bapI$ with an arabinose inducible promoter was mated into the indicated strain for complementation | JY583, This Study   |
| $\Delta rbmC$<br>$bapI_{\Delta Velcro}$ + $P_{BAD}$ -<br>$bapI$       | $pEVS$ ( $P_{BAD}$ - $bapI$ , $Kan^R$ ),<br>$vpvC^{W240R}$ , $\Delta rbmC$ ,<br>$bapI_{\Delta Velcro}$ , $\Delta VCI807::P_{tac}$ -<br>$mNeonGreen$ , $Spec^R$          | $pEVS$ containing $bapI$ with an arabinose inducible promoter was mated into the indicated strain for complementation | XH032, This Study   |
| $\Delta rbmC$ $bapI_{\Delta 57aa}$<br>+ $P_{BAD}$ - $bapI$            | $pEVS$ ( $P_{BAD}$ - $bapI$ , $Kan^R$ ),<br>$vpvC^{W240R}$ , $\Delta rbmC$ ,<br>$bapI_{\Delta 57aa}$ , $\Delta VCI807::P_{tac}$ -<br>$mNeonGreen$ , $Spec^R$            | $pEVS$ containing $bapI$ with an arabinose inducible promoter was mated into the indicated strain for complementation | ZJ067, This Study   |
| $\Delta rbmC$ $bapI_{\Delta\beta}$ -<br>$prismB$ + $P_{BAD}$ - $bapI$ | $pEVS$ ( $P_{BAD}$ - $bapI$ , $Kan^R$ ),<br>$vpvC^{W240R}$ , $\Delta rbmC$ , $bapI_{\Delta\beta}$ -<br>$prismB$ , $\Delta VCI807::P_{tac}$ -<br>$mNeonGreen$ , $Spec^R$ | $pEVS$ containing $bapI$ with an arabinose inducible promoter was mated into the indicated strain for complementation | XH080, This Study   |

| <b>Strains used for <i>E. Coli</i> Protein Purification (all in NEB T7-Express or T7-Shuffle)</b> |                  |             |           |
|---------------------------------------------------------------------------------------------------|------------------|-------------|-----------|
| Name                                                                                              | Construct/Vector | Description | Reference |

|                                                      |                                                                    |                                                                                                               |                     |
|------------------------------------------------------|--------------------------------------------------------------------|---------------------------------------------------------------------------------------------------------------|---------------------|
| Bap1 $_{\Delta 57aa}$ -GFP <sub>UV</sub>             | Bap1 (VC_1888 residues 25-414, 473-691) in pNGFP-BC (Kawate, 2006) | Near full-length Bap1 missing 57aa loop used for crystal structure - signal peptide removed on all constructs | 11                  |
| $\beta$ -propellerB-GFP <sub>UV</sub>                | Bap1 $\beta$ -propeller (25-316, 515-691) in pNGFP-BC              | Bap1 $\beta$ -propeller domain with $\beta$ -prism spliced out                                                | 11                  |
| $\beta$ -prismB-GFP <sub>UV</sub>                    | Bap1 $\beta$ -prism (316-414, 473-514) in pNGFP-BC                 | Bap1 $\beta$ -prism missing 57aa loop                                                                         | 4                   |
| $\beta$ -prismC1-GFP <sub>UV</sub>                   | RbmC first $\beta$ -prism (VC_0930 residues 505-640) in pNGFP-BC   | RbmC first $\beta$ -prism domain                                                                              | 4                   |
| $\beta$ -prismC2-GFP <sub>UV</sub>                   | RbmC second $\beta$ -prism (823-957) in pNGFP-BC                   | RbmC second $\beta$ -prism domain                                                                             | 4                   |
| $\beta$ -prismC2 <sub>D853A</sub> -GFP <sub>UV</sub> | Same with D853A point mutation                                     | RbmC second $\beta$ -prism domain with inactivating mutation in the glycan-binding pocket                     | 4                   |
| RbmC <sub>M1M2</sub> -GFP <sub>UV</sub>              | RbmC (23-220) in pNGFP-BC                                          | RbmC M1M2 tandem $\beta\gamma$ -crystallin domains                                                            | This Study          |
| RbmC <sub>M2</sub> -GFP <sub>UV</sub>                | RbmC (113-220) in pNGFP-BC                                         | RbmC M2 $\beta\gamma$ -crystallin domain only                                                                 | This Study          |
| StcE-X409-GFP <sub>UV</sub>                          | StcE (797-898) in pNGFP-BC                                         | C-terminal $\beta\gamma$ -crystallin domain of <i>E. coli</i> StcE                                            | This Study          |
| RbmC $_{\beta}$ -propeller-GFP <sub>UV</sub>         | RbmC (218-504, 641-822, with VGA linker) in pNGFP-BC               | RbmC $\beta$ -propeller domain with first $\beta$ -prism spliced out                                          | This Study          |
| RbmA-GFP <sub>UV</sub>                               | RbmA (31-271) in pNGFP-BC                                          | RbmA fused to GFP <sub>UV</sub>                                                                               | This Study          |
| GFP <sub>UV</sub>                                    | pNGFP-BC                                                           | GFP <sub>UV</sub> alone                                                                                       | 12                  |
| <b>Strains used for Other Purposes</b>               |                                                                    |                                                                                                               |                     |
| $\Delta rbmC \Delta bap1 \Delta rbmA \Delta pomA$    | $\Delta rbmC, \Delta bap1, \Delta rbmA, \Delta pomA, vpvC^{W240R}$ | <i>rbmC, bap1, rbmA</i> and <i>pomA</i> are all deleted. Used for VPS purification.                           | JY286 <sup>13</sup> |
| Rg                                                   | $vpvC^{W240R}, \Delta VC1807::P_{tac} mScarlett-I, Spec^R$         | Rugose strain with mScarlett-I fluorescent protein inserted at a non-essential site in the genome (VC1807)    | JN132, This Study   |
| Caco-2 cells                                         |                                                                    | Human colonic epithelial Caco-2 cells                                                                         | ATCC HTB-37         |

**Supplementary Table 2. Primers Used in this Study.**

| Primer Name              | Primer Sequence (5' to 3')*                        | Description                                                   |
|--------------------------|----------------------------------------------------|---------------------------------------------------------------|
| <b>Mutant constructs</b> |                                                    |                                                               |
| PTN0034                  | ATGATCTATTCTTCTTCCATTCACTC                         | <i>rbmC</i> 1.5 kb arms F1                                    |
| PTN0035                  | ATCTTTAAGTGGGTAAACTGCTATTTTG                       | <i>rbmC</i> 1.5 kb arms R2                                    |
| PTN0014                  | ACTCGTTTCAACGGCTTGAGC                              | <i>rbmC</i> <sub>Δβ</sub> - <i>prismC1</i> R1                 |
| PTN0015                  | gctcaagccgtgaaacgagtACCAATGATCTGGATGTAAAAGGG       | <i>rbmC</i> <sub>Δβ</sub> - <i>prismC1</i> F2                 |
| PTN0016                  | CTCACCACCCACTGCAGC                                 | <i>rbmC</i> <sub>Δβ</sub> - <i>prismC2</i> R1                 |
| PTN0017                  | gctgcagtgggtggtgagTAACGACTCATCGCTTACTGAACTG        | <i>rbmC</i> <sub>Δβ</sub> - <i>prismC2</i> F2                 |
| PTN0008                  | CGAGCTGTCACCGTCATAAGG                              | <i>rbmC</i> <sub>Δβ</sub> - <i>propeller</i> R1 up            |
| PTN0009                  | ccttatgacggtgacagctcgCAAGCCGTTGAAACGAGTGAGTTC      | <i>rbmC</i> <sub>Δβ</sub> - <i>propeller</i> F2 middle        |
| PTN0010                  | ATCATTGGTACCATTTTGC GTAGC                          | <i>rbmC</i> <sub>Δβ</sub> - <i>propeller</i> R2 middle        |
| PTN0011                  | gctacgcaaaatggtaccaatgatGGTGAGTCTCCAATTTTCGGTTACTC | <i>rbmC</i> <sub>Δβ</sub> - <i>propeller</i> F3 down          |
| PTN0045                  | CGGTTCGTT CAGGATTTGCGATTGcgGCGATTGGTGCTTCTGCTT CG  | <i>rbmC</i> <sub>β</sub> - <i>prismC1</i> <sub>D549A</sub> F  |
| PTN0046                  | CGAAGCAGAAGCACCAATCGCcgCAATCGCAAATCCTGAACGA ACCG   | <i>rbmC</i> <sub>β</sub> - <i>prismC1</i> <sub>D549A</sub> R  |
| PTN0047                  | CGGTTCGTT CAGGATTTGCGATTGcg                        | detect F                                                      |
| PTN0057                  | GCTGCAGTGGGTGGTGAGGACTACAAAGACCATGACGGTGATT ATAAA  | <i>rbmC</i> <sub>Δβ</sub> - <i>prismC2</i> - <i>3XFLAG</i> F2 |
| PTN0001                  | TTCGGCTTCATTCGTTGTGGC                              | <i>rbmC</i> ΔM1M2 R1                                          |
| PTN0002                  | gccacaacgaatgaagccgaaTATGACGGTGACAGCTCGGC          | <i>rbmC</i> ΔM1M2 F2                                          |

|          |                                                            |                                                                 |
|----------|------------------------------------------------------------|-----------------------------------------------------------------|
| PTN0003  | caaggtaaaggaggtcttaciaaATGACG                              | <i>rbmC</i><br>$\Delta$ M1M2<br>detect F                        |
| PTN0004  | CACTGCCTTGCCAAGACCAC                                       | <i>rbmC</i><br>$\Delta$ M1M2<br>detect R                        |
| PTN0053  | CAATGCTCAGTCGTTTGGGTATAG                                   | Amplify<br>VC1807 F                                             |
| PTN0054  | TGTGAGACACCTATCCCAATCTAAG                                  | Amplify<br>VC1807 R                                             |
| PTN0063  | GAATTCgatccgggtattgattgagc                                 | Amplify<br>pBAD<br>vector F                                     |
| PTN0064  | TTTAGACCTCCTGCGGCCGC                                       | Amplify<br>pBAD<br>vector R                                     |
| PTN0066  | gctcaatcaatcaccggatgaattcTCactgtcatcgtcatccttgaatcg        | Flag tagged<br>construct<br>insert for<br>pBAD<br>vector R      |
| PTN0067  | gcgccgcaggaggtctaaaATGAAACAGACAAAACGTTGACCG                | <i>bap1</i> -<br>3XFLAG<br>insert for<br>pBAD<br>vector F       |
| XH-P-003 | CAATAACGCTTCACTGATCATGGTTGCCAATGACTACGAT                   | <i>bap1</i> $\Delta\beta$ -<br><i>prismB</i> +57aa-<br>3XFLAG F |
| XH-P-004 | ATCGTAGTCATTGGCAACCATGATCAGTGAAGCGTTATTG                   | <i>bap1</i> $\Delta\beta$ -<br><i>prismB</i> +57aa-<br>3XFLAG R |
| XH-P-026 | GTGCAACCACTGTTGATGCTGCTGGTGTGACTGCTGACCA<br>ATCACA         | <i>bap1</i> $\Delta\beta$ - <i>prismB</i><br>F                  |
| XH-P-027 | TGTGATTGGTCAGCAGTCACAACACCAGCAGCATCAACAGTGG<br>TTGCAC      | <i>bap1</i> $\Delta\beta$ - <i>prismB</i><br>R                  |
| XH-P-008 | CTCAGGATGAAAAACGCTGGTAGACTGTATATCACTGCTGCTT<br>GACGC       | <i>bap1</i> $\Delta$ Velcro F                                   |
| XH-P-011 | GCGTCAAGCAGCAGTGATATACAG                                   | <i>bap1</i> $\Delta$ Velcro R                                   |
| XH-P-034 | GCTCAATCAATCACCGGATCGAATTCTCACTTCAGCGGAACGC<br>GAATGGTCGCT | construct<br>insert for<br>pBAD<br>vector R                     |
| ZJ-P-005 | GGGGTCAAAAGATTCTGCGTTTACTTCGACCACAGTACGCTAT<br>GACA        | <i>bap1</i> $\Delta$ 57aa F                                     |

|          |                                                         |                                                                         |
|----------|---------------------------------------------------------|-------------------------------------------------------------------------|
| ZJ-P-006 | TGTCATAGCGTACTGTGGTTCGAAGTAAACGCAGAATCTTTTGA<br>CCCC    | <i>bap1</i> <sub>Δ57aa</sub> R                                          |
| ZJ-P-019 | CTTGTCATCGTCATCCTTGTAATCGATA                            | Universal<br>sequencer<br>for 3xFLAG                                    |
| ZJ-P-026 | AGCAGCATTGAAACTTCCGC                                    | 2.7kb<br>upstream of<br><i>bap1</i>                                     |
| ZJ-P-027 | ATGAAATTCACGATAACCAGAAAACCG                             | 2.7kb<br>downstream<br>of <i>bap1</i>                                   |
| ZJ-P-052 | GTGCAACCACTGTTGATGCTTATCTAGGATTAGAGTGGAAAAC<br>TAAAACGG | <i>bap1</i> <sub>Δβ-</sub><br><i>prismB</i> <sup>+57aa</sup><br>Front F |
| ZJ-P-053 | CCGTTTTAGTTTTCCACTCTAATCCTAGATAAGCATCAACAGTG<br>GTTGCAC | <i>bap1</i> <sub>Δβ-</sub><br><i>prismB</i> <sup>+57aa</sup><br>Front R |
| ZJ-P-054 | GTTCTGTGACACTGTTCGAAAGTGACTGCTGACCAATCACACA             | <i>bap1</i> <sub>Δβ-</sub><br><i>prismB</i> <sup>+57aa</sup><br>Back F  |
| ZJ-P-055 | TGTGTGATTGGTCAGCAGTCACTTTTCGACAGTGTCACAGGAAC            | <i>bap1</i> <sub>Δβ-</sub><br><i>prismB</i> <sup>+57aa</sup><br>Back R  |
| ZJ-P-046 | CATTTAATGACTCAAAGCACCGCACAGTCTGCCGTTTATGGCT<br>ACA      | <i>bap1</i> <sub>Δβ-</sub><br><i>propeller</i> Front<br>F               |
| ZJ-P-047 | TGTAGCCATAAACGGCAGACTGTGCGGTGCTTTGAGTCATTAA<br>ATG      | <i>bap1</i> <sub>Δβ-</sub><br><i>propeller</i> Front<br>R               |
| ZJ-P-062 | CGGTGCAGTTCCTAGTTGGTAAATAAAGATACTTCTGCCAGCC<br>GC       | <i>bap1</i> <sub>Δβ-</sub><br><i>propeller</i> Back<br>F                |
| ZJ-P-063 | GCGGCTGGCAGAAGTATCTTTATTTACCAACTAGGAACTGCAC<br>CG       | <i>bap1</i> <sub>Δβ-</sub><br><i>propeller</i> Back<br>R                |
| ZJ-P-060 | GATGCGGAAAAAGTGAGTGAGTCT                                | 1kb<br>upstream of<br><i>bap1</i>                                       |
| ZJ-P-061 | CGCTGCACGGCATGATTAAAAC                                  | 1kb<br>downstream<br>of <i>bap1</i>                                     |
| PJY140   | AATCAAACCGGGCTTTAAATTCATCTCGAC                          | 3kb<br>upstream of<br><i>bap1</i>                                       |
| PJY141   | CATGATATGCAACATCTACTGAAAGAGGTGCA                        | 3kb<br>downstream<br>of <i>bap1</i>                                     |



|                                                                                 |                                                    |                                          |
|---------------------------------------------------------------------------------|----------------------------------------------------|------------------------------------------|
| PJY131                                                                          | GTCACCTCTGGCCTTTATAACTGG                           | 3kb upstream of <i>vpsL</i>              |
| PJY132                                                                          | GCTTGCAGCTCGTTATTGATACCATT                         | 3kb downstream of <i>vpsL</i>            |
| PJY129                                                                          | ATATCCCGATCCAGTGCATGCAGC                           | 3kb upstream of <i>vpvc</i>              |
| PJY130                                                                          | CCGGCTGATGCTTTGTGTCTAACGTG                         | 3kb downstream of <i>vpvc</i>            |
| <b><i>E. coli</i> expression construct primers (all to clone into pNGFP-BC)</b> |                                                    |                                          |
| RAO.0418                                                                        | GCCGCGCCATGGGAACAACGAATGAAGCCGAAGGGTG              | RbmC <sub>M1M2</sub> F                   |
| RAO.0549                                                                        | CGCGCGCTCGAGTTAGTCACCGTCATAAGGGACAAC               | RbmC <sub>M1M2</sub> R                   |
| RAO.0558                                                                        | CGCGCGCATATGCGTTCAATGCGAGTACTGGCTTCTG              | RbmC <sub>M2</sub> F (use with RAO.0549) |
| RAO.0649                                                                        | CGCGCGCCATGGGGCAGGCACTTCCAGCAAAAAG                 | StcE <sub>C_term</sub> F                 |
| RAO.0652                                                                        | GCGCGCCTCGAGTTATTTATATACAACCCTCATTGACC             | StcE <sub>C_term</sub> R                 |
| RAO.0630                                                                        | CGCGCGCCATGGCAGACGGTGACAGCTCGGCACTC                | RbmC <sub>β-propeller</sub> F1           |
| RAO.0637                                                                        | GCTCAAGCCGTTGAAACGGTTGGGGCTCAAATGGTACCAATG<br>ATC  | RbmC <sub>β-propeller</sub> F2           |
| RAO.0638                                                                        | GATCATTGGTACCATTTTGAGCCCCAACCGTTTCAACGGCTTGA<br>GC | RbmC <sub>β-propeller</sub> R1           |
| RAO.0453                                                                        | CCGCGGCTCGAGCTCACCACCCACTGCAGCGCGTAATG             | RbmC <sub>β-propeller</sub> R2           |
| RAO.0648                                                                        | CGCGCGCCATGGAAGTGGATTGTGAGTTACAGCCAGTG             | RbmA F1                                  |
| RAO.0580                                                                        | CGCGCGCTCGAGTTATTTTTTTTACCCTGTCATTGACTG            | RbmA R1                                  |

\*lowercase nucleotides indicate overlapping sequence for SOE or nucleotide change for aa mutations

## Supplementary References

1. Smith, D. R. *et al.* *In situ* proteolysis of the *Vibrio cholerae* matrix protein RbmA promotes biofilm recruitment. *Proc. Natl. Acad. Sci. U.S.A.* **112**, 10491–10496 (2015).
2. Fong, J. C. *et al.* Structural dynamics of RbmA governs plasticity of *Vibrio cholerae* biofilms. *eLife* **6**, e1002210 (2017).
3. Hau, W. L. W., Trau, D. W., Sucher, N. J., Wong, M. & Zohar, Y. Surface-chemistry technology for microfluidics. *J. Micromech. Microeng.* **13**, 272–278 (2003).
4. De, S., Kaus, K., Sinclair, S., Case, B. C. & Olson, R. Structural basis of mammalian glycan targeting by *Vibrio cholerae* cytolysin and biofilm proteins. *PLOS Pathog.* **14**, e1006841 (2018).
5. Floyd, K. A. *et al.* c-di-GMP modulates type IV MSHA pilus retraction and surface attachment in *Vibrio cholerae*. *Nat. Commun.* **11**, 1549 (2020).
6. Lin, H., Yu, M., Wang, X. & Zhang, X.-H. Comparative genomic analysis reveals the evolution and environmental adaptation strategies of Vibrios. *BMC Genomics* **19**, 135 (2018).
7. Yan, J., Nadell, C. D. & Bassler, B. L. Environmental fluctuation governs selection for plasticity in biofilm production. *ISME J.* **11**, 1569–1577 (2017).
8. Yan, J., Sharo, A. G., Stone, H. A., Wingreen, N. S. & Bassler, B. L. *Vibrio cholerae* biofilm growth program and architecture revealed by single-cell live imaging. *Proc. Natl. Acad. Sci. USA* **113**, e5337-5343 (2016).
9. Nijjer, J. *et al.* Mechanical forces drive a reorientation cascade leading to biofilm self-patterning. *Nat. Commun.* **12**, 6632 (2021).
10. Zhang, Q. *et al.* Morphogenesis and cell ordering in confined bacterial biofilms. *Proc. Natl. Acad. Sci. USA* **118**, e2107107118 (2021).

11. Kaus, K. *et al.* The 1.9 Å crystal structure of the extracellular matrix protein Bap1 from *Vibrio cholerae* provides insights into bacterial biofilm adhesion. *J. Biol. Chem.* **294**, 14499–14511 (2019).
12. Kawate, T. & Gouaux, E. Fluorescence-detection size-exclusion chromatography for precrystallization screening of integral membrane proteins. *Structure* **14**, 673–681 (2006).
13. Yan, J. *et al.* Bacterial biofilm material properties enable removal and transfer by capillary peeling. *Adv. Mater.* **30**, 1804153 (2018).
